# Supplementary material
Source: MDPI journal article supplement (https://www.mdpi.com/search?q=molecules-26-00723)
Supplement: s001 [file molecules-26-00723-s001.pdf]

# Red Arils of *Taxus Baccata* L. – A New Source of Valuable Fatty Acids and Nutrients

Małgorzata Tabaszewska <sup>1</sup>, Jaroslawa Rutkowska <sup>2,\*</sup>, Łukasz Skoczylas <sup>1</sup>, Jacek Słupski <sup>1</sup>, Agata Antoniewska <sup>2</sup>, Sylwester Smoleń <sup>3</sup>, Marcin Łukasiewicz <sup>4</sup>, Damian Baranowski <sup>2</sup>, Iwona Duda <sup>5</sup> and Jörg Pietsch <sup>6</sup>

<sup>1</sup> Department of Plant Product Technology and Nutrition Hygiene, Faculty of Food Technology, University of Agriculture in Cracow, Balicka st. 122, 30-149, Cracow, Poland; małgorzata.tabaszewska@urk.edu.pl (M.T.); lukasz.skoczylas@urk.edu.pl (Ł.S.) jacek.slupski@urk.edu.pl (J.S.)

<sup>2</sup> Institute of Human Nutrition Sciences, Faculty of Human Nutrition, Warsaw University of Life Sciences (WULS-SGGW), Nowoursynowska st.159c, 02-776 Warsaw, Poland; agata\_antoniewska@sggw.edu.pl (A.A.); damian\_baranowski@sggw.edu.pl (D.B.)

<sup>3</sup> Department of Plant Biology and Biotechnology, Faculty of Biotechnology and Horticulture, University of Agriculture in Cracow, Al. 29 Listopada 54, 31-425 Cracow, Poland; sylwester.smolen@urk.edu.pl (S.S.)

<sup>4</sup> Department of Engineering and Machinery for Food Industry, Faculty of Food Technology, University of Agriculture in Cracow, Balicka st. 122, 30-149, Cracow, Poland; marcin.lukasiewicz@urk.edu.pl (M.Ł.)

<sup>5</sup> Department of Animal Product Technology, Faculty of Food Technology, University of Agriculture in Cracow, Balicka st. 122, 30-149, Cracow, Poland; iwona.duda@urk.edu.pl (I.D.)

<sup>6</sup> Institute of Legal Medicine, Medical Faculty Carl Gustav, Dresden Technical University, Fetscherstr. 74, D-01307 Dresden, Germany; [joerg.pietsch@tu-dresden.de](mailto:joerg.pietsch@tu-dresden.de) (J.P.)

\* Correspondence: jaroslawa\_rutkowska@sggw.edu.pl

## Supplementary files:

**Table S1.** Comparison of fatty acid composition (g/100 g of FA) of red arils and seeds from Koszalin site (means  $\pm$  SE).

| Fatty acid                        | Red arils                                      | Seeds                                          |
|-----------------------------------|------------------------------------------------|------------------------------------------------|
| <b>SFAs</b>                       | <b>33.12 <math>\pm</math> 0.31<sup>b</sup></b> | <b>4.87 <math>\pm</math> 0.02<sup>a</sup></b>  |
| C10:0                             | 0.07 $\pm$ 0.00                                | ND                                             |
| C12:0                             | 0.30 $\pm$ 0.02                                | ND                                             |
| C14:0                             | 6.76 $\pm$ 0.04 <sup>b</sup>                   | 0.05 $\pm$ 0.01 <sup>a</sup>                   |
| C16:0                             | 22.37 $\pm$ 0.31 <sup>b</sup>                  | 2.92 $\pm$ 0.01 <sup>a</sup>                   |
| C17:0                             | 0.13 $\pm$ 0.00 <sup>b</sup>                   | 0.04 $\pm$ 0.00 <sup>a</sup>                   |
| C18:0                             | 3.37 $\pm$ 0.03 <sup>b</sup>                   | 1.79 $\pm$ 0.00 <sup>a</sup>                   |
| C20:0                             | ND                                             | 0.07 $\pm$ 0.00                                |
| C22:0                             | 0.11 $\pm$ 0.01                                | ND                                             |
| C24:0                             | 0.00 $\pm$ 0.00                                | ND                                             |
| <b>MUFAs</b>                      | <b>13.04 <math>\pm</math> 0.04<sup>a</sup></b> | <b>50.93 <math>\pm</math> 0.03<sup>b</sup></b> |
| C14:1                             | 0.15 $\pm$ 0.00                                | ND                                             |
| C16:1 <i>n-7</i>                  | 0.12 $\pm$ 0.00 <sup>b</sup>                   | 0.03 $\pm$ 0.00 <sup>a</sup>                   |
| C16:1 <i>n-9</i>                  | 0.26 $\pm$ 0.00                                | ND                                             |
| C17:1                             | 0.14 $\pm$ 0.01                                | ND                                             |
| C18:1 <i>c9</i>                   | 12.35 $\pm$ 0.06 <sup>a</sup>                  | 50.15 $\pm$ 0.04 <sup>b</sup>                  |
| C18:1 <i>c11</i>                  | 0.00 $\pm$ 0.00 <sup>a</sup>                   | 0.52 $\pm$ 0.00 <sup>b</sup>                   |
| C20:1 <i>n-9</i>                  | 0.04 $\pm$ 0.00 <sup>a</sup>                   | 0.23 $\pm$ 0.00 <sup>b</sup>                   |
| <b><i>n-3</i>-PUFAs</b>           | <b>24.18 <math>\pm</math> 0.20<sup>b</sup></b> | <b>1.79 <math>\pm</math> 0.02<sup>a</sup></b>  |
| C18:3 <i>c9 c12 c15</i>           | 23.43 $\pm$ 0.23 <sup>b</sup>                  | 1.79 $\pm$ 0.02 <sup>a</sup>                   |
| C20:3 <i>c11 c14 c17</i>          | 0.76 $\pm$ 0.02                                | ND                                             |
| <b><i>n-6</i>-PUFAs</b>           | <b>25.19 <math>\pm</math> 0.16<sup>a</sup></b> | <b>26.84 <math>\pm</math> 0.02<sup>b</sup></b> |
| C18:2 <i>c9 c12</i>               | 21.33 $\pm$ 0.11 <sup>a</sup>                  | 25.69 $\pm$ 0.02 <sup>b</sup>                  |
| C18:3 <i>c6 c9 c12</i>            | 0.80 $\pm$ 0.02 <sup>b</sup>                   | 0.43 $\pm$ 0.00 <sup>a</sup>                   |
| C20:2 <i>c11 c14</i>              | 0.16 $\pm$ 0.00 <sup>a</sup>                   | 0.72 $\pm$ 0.00 <sup>b</sup>                   |
| C22:2 <i>c13 c16</i>              | 2.33 $\pm$ 0.04                                | ND                                             |
| C20:4 <i>c5 c8 c11 c14</i>        | 0.57 $\pm$ 0.02                                | ND                                             |
| <b><math>\Delta</math>5-UIFAs</b> | <b>1.08 <math>\pm</math> 0.01<sup>a</sup></b>  | <b>15.20 <math>\pm</math> 0.03<sup>b</sup></b> |
| C18:2 <i>c5 c9</i>                | ND                                             | 11.08 $\pm$ 0.02                               |
| C18:3 <i>c5 c9 c12</i>            | 0.08 $\pm$ 0.00 <sup>a</sup>                   | 1.53 $\pm$ 0.01 <sup>b</sup>                   |
| C20:3 <i>c5 c11 c14</i>           | 0.82 $\pm$ 0.02 <sup>a</sup>                   | 2.34 $\pm$ 0.00 <sup>b</sup>                   |
| C20:4 <i>c5 c11 c14 c17</i>       | 0.17 $\pm$ 0.00 <sup>a</sup>                   | 0.25 $\pm$ 0.00 <sup>b</sup>                   |
| <b>PUFAs</b>                      | <b>50.45 <math>\pm</math> 0.16<sup>b</sup></b> | <b>43.83 <math>\pm</math> 0.01<sup>a</sup></b> |
| NI                                | 3.38 $\pm$ 0.45 <sup>b</sup>                   | 0.37 $\pm$ 0.02 <sup>a</sup>                   |

<sup>a, b</sup> – values bearing the same superscripts in rows do not differ significantly ( $p < 0.05$ ) from each other.

Abbreviations:  $\Delta$ 5-UIFAs -  $\Delta$ 5-unsaturated polymethylene-interrupted FAs; C18:2  $\Delta$  *c9* - taxoleic acid; C18:3  $\Delta$ 5*c9c12* - pinolenic acid; C20:3  $\Delta$ 5*c11c14* - sciadonic acid; C20:4  $\Delta$ 5*c11c14c17* - juniperonic acid; ND not detected, NI – not identified.

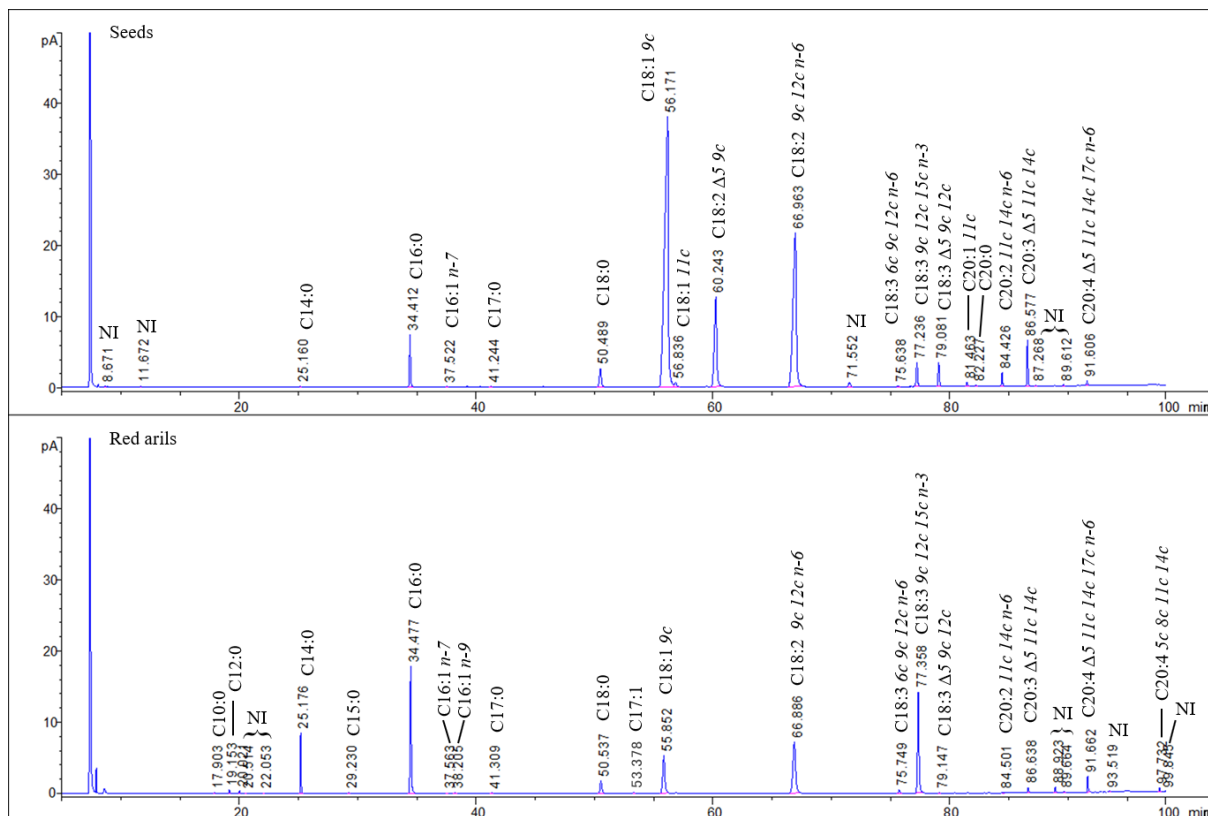

**Figure S1.** Separation of FAs composition of lipids extracted from seeds and red arils of *Taxus baccata* by gas chromatography.

Abbreviations: NI – not identified
